# Supplementary material for: Clinical outcome of endonasal endoscopic prelacrimal approach in managing different maxillary pathologies
Source: PeerJ. 2020 Jan 3;8:e8331. doi: 10.7717/peerj.8331 (PMC6944117; doi:10.7717/peerj.8331)
Supplement: Supplemental Information 1 [file peerj-08-8331-s001.xlsx]

## Sheet: 工作表1
No	Age	Gender	Initial Symptoms	Duration of symptom	CT finding	Primary surgery: 0 ; Revision surgery: 1	Previous surgery	Operation date	Pre-OP SNOT-22	Pre-OP VAS	Lund-Mackay score	Modified LM score of maxilla	Krous stage	Pre-lacrimal recess anterior to posterior distance	Pre-lacrimal recess height	Disease side (1: Right, 2: Left, 3: bilateral)	maxillary sinus lesion location (A: Anterior wall, M: Medial wall, I:Inferior wall, P:posterior wall, L: lateral wall, S: superior wall, whole)	Complication	Follow up period	Post-OP SNOT-22	Post-OP VAS		Medial maxillectomy	Inferior meatotomy	FESS	Septoplasty	Papilloma / non-papilloma	Final pathology
1	59	1	pain, bloody rhinorrhea, nasal obstruction		soft tissue over medial and posterior maxillary wall	0	0	2018-08-29	17	8	5	3	3	3.2	23.5	2	M, P, ostum,	temporary numbness	6.1	7	1	MMA, PLA medial maxillectomy	1	0	1	0	1	IP
2	56	1	nasal obstruction	12	soft tissue over medial and posterior maxillary wall	1	revision ESS x1	2018-10-12	2	1	3	2	3	6.6	23	1	M,P, ostium	delayed wound healing	1.63333	2	0	MMA, PLA medial maxillectomy	1	0	1	0	1	IP
3	53	1	Pain, recurrent swellings	60	mucocele formation within shrinkaged maxillary sinus	1	facial trauma s/p titanium mesh	2018-08-09	20	9	1	2		6.3	26	2	L, P	0	6.76667	2	1	MMA. PLA,Inferior antrostomy	0	1	1	0	0	post-trauma mucocele
4	25	1	nasal obstruction, paranosmia, purulent rhinorrhea	72	cloudiness full of the maxillary sinus with scattered calcifications	0	0	2018-07-05	53	10	6	4		6.6	28.6	1	whole	0	7.93333			MMA. PLA	0	0	1	0	0	sinonasl organized hematoma
5	30	1	nasal obstruction, epistaxis	72	soft tissue density within right maxillary sinus, anterior, medial, and lateral aspects	1	revision ESS X2	2016-12-06			3	3	3	4.9	27.6	1	M, A, lateral, ostium	temporary cheek numbness	21.7333			PLA medial maxillectomy	1	0	0	0	1	IP
7	58	1	nasal obstruction, facial numbness, ophtalmoplegia		soft tissue over ITF and posterior maxillary wall	1	repeated biopsy x2	2018-05-31	(01/14respectively)		1	1		4.6	25.1	1	P, I	0	2.13333			PLA	0	0	0	0	0	HNC with recur
8	55	2	nasal obstruction, purulrent rhinorrhea, facial pressureness		maxillary rhinosinusitis with polyps, full within the sinus	0	0	2018-07-18	35	10	9	4		3.4	28.3	1	whole	0	7.5	13	0	PLA, MMA/ Bil ESS, SMR	0	0	1	1	0	CRSwNPs
9	54	1	facial pain	5	Lt maxillary cyst with bony capsule	0	0	2018-02-05	24	1	2	4		6.3	26.7	2	I	0	12.6333	14	0	Lt ESS + PLA	0	0	1	0	0	pathology: inflammation , I think it is odentogenic cyst
10	48	2	PND	12	Rt ectopic tooth with cyst	0	0	2018-05-04	34	10	7	3		5.7	19	1	I, P	temporary numbness	9.7	33	9	Rt PLA+medial maxillectomy+ESS, Lt polypectomy	1	0	1	0	0	ectopic tooth with cyst
11	49	2	Lt nasal discharge	36	Lt maxillary sinusitis or tumor	0	0	2018-10-05	27	3	2	4	3	4.4	27.4	2	P,L	temporary numbness	4.36667	43	5	Lt PLA + medial maxillectomy	1	0	0	0	1	IP with focal atyia , diffuse attact in posterior and lateral maxillary wall
12	44	1	nasal obstruction and blood tingled sputum	6	Lt maxillary cloudness with mild enhancement r/o tumor	0	0	2018-09-08	18	5	2	3	3	5.6	27.3	2	I.M	temporary numbness	7.16667	9	2	Lt PLA	0	0	0	0	1	IP, mixed inverted and exophytic, tumor from inferior medial wall with focal osteogenesis
13	71	1	accidently found by dentist	1	Lt sinusitis r/o fungal or tumor	0	0	2018-09-28	2	0	1	2	3	7.6	30.5	2	A,I	epistaxis, temporary numbness	3.66667	0	0	Lt PLA + medial maxillectomy + Inf. Antrostomy	1	1	0	0	1	IP, from anterior and inferor wall, diffuse
14	54	2	Rt nasal obstruction	3	Bil maxillary sinusitis and right middle meatus polyp	0	0	2015-04-17	85	10	8	3	3	5	21.5	2	A	temporary numbness	41.4667	7	0	Rt ESS, Lt PLA + medial maxillectomy	1	0	1	0	1	bil IP, from Rt lamina papyracea, Lt maxillary anterior wall diffuse
15	81	1	nasal obstruction and blood tingled sputum	3	Bil CRS	1	post bil ESS for 4 times	2015-06-05	17	4	23	4	3	4.4	31.5	2	whole	temporary numbness	41	11	2	Rt FH FESS, Lt FH FESS + PLA with medial maxillectomy + Inf antrostomy	1	1	1	0	1	Lt exophytic papilloma, diffused involvement of maxillary sinus
16	17	1	blunt eye trauma with orbital retraction	2	Lt orbital floor and medial wall fracture with intraorbital fat hernation	0	0	2017-08-02			1	1		5.4	19.4	2	S	0	1.4			Lt pre-lacrimal approach with orbital medial and floor repair	0	0	0	0	0	Left orbital wall fracutre
17	69	1	Rt nasal bleeding	1	Bil CRS , Rt maxillary , Lt maxillary and ant. Post. Ethmoid	1	Left Caldwell Luc	2016-09-21	20	6	4	3	3	5.3	25.6	1	A,L,P	temporary numbness	19.1667	11	4	Rt PLA with medial maxillectomy	1	0	1	0	1	Rt IP , Lt CRSsNP
18	59	1	purulent discharge	1	Rt maxillary and ethmoid sinusitis	0	0	2018-07-21	40	8.6	5	4		4.5	33.3	1	whole	0	6.16667	13	3	Rt PLA + Lt FESS	0	0	1	0	0	Rt maxillary sinus polyposis
19	58	1	epistaxis	2	Rt ectopic teeth with dentigerous cyst	0	0	2018-06-29	48	7	1	1		3.8	22.2	1	I,P	temporary numbness	4.53333	42	3	Rt PLA + MMA	0	0	1	0	0	Rt maxillary ectopic tooth with cyst
20	58	2	nasal discharge	3	Lt CRS with retention cyst	1	s/p left ESS for 3 times	2016-11-18	51	10	4	3		8.1	30.1	2	I	0	23.2667	16	1	Lt PLA and ESS, SMR	0	0	1	1	0	Lt CRS and cavernous hemangioma
21												3		5.1	32.4				40	10	3
21	42	1	nasal discharge	6	bil. Recurrent rhinosinusitis in bil. Maxillary and frontal	1	bil FESS for 5 times	2015-02-27	75	8	18	4		5.2	34.9	3	whole	0	40.0333	10	3	Bil PLA + FESS	0	0	1	0	0	bil recurrent CRSwNP
22	46	1	Rt facial swelling	12	Rt maxillary sinus inflammation with soft tissue and orbital wall involvement	0	0	2017-05-24	19	10	1	3		8.7	28.3	1	A	0	12.0333			Rt PLA with lacrimal duct tumor biopsy	0	0	0	0	0	Rt lacrimal duct adenoid cystic carcinoma, with bone meta , liver meta
